# Supplementary material for: Fluoroborophosphates: a family of potential deep ultraviolet NLO materials
Source: Royal Society of Chemistry journal article supplement (doi:10.1039/c9qi00006b), 2019-01-01
Supplement: c9qi00006b1.pdf [file c9qi00006b1.pdf]

## **Fluoroborophosphates: a family of potential deep ultraviolet**

### **NLO materials**

**Baolin Wu<sup>a, b, c, d</sup> Chunli Hu<sup>a</sup> Ruling Tang<sup>a, b, c</sup> Feifei Mao<sup>a</sup> Jianghe Feng<sup>a</sup> Jianggao Mao<sup>\*a</sup>**

<sup>a</sup> State Key Laboratory of Structural Chemistry, Fujian Institute of Research on the Structure of Matter, Chinese Academy of Sciences, Fuzhou 350002, China.

E-mail: [mjg@fjirsm.ac.cn](mailto:mjg@fjirsm.ac.cn)

<sup>b</sup> School of Physical Science and Technology, ShanghaiTech University, Shanghai 201210, China

<sup>c</sup> University of the Chinese Academy of Sciences, Beijing, 100049, China

<sup>d</sup> Shanghai Institute of Ceramics, Chinese Academy of Sciences, Shanghai 200050, China

## Supporting information

### Content

Table S1. Crystal data and structure refinement for RbBPO<sub>4</sub>F, CsBPO<sub>4</sub>F and (NH<sub>4</sub>)<sub>2</sub>BPO<sub>4</sub>F<sub>2</sub>.

Table S2. Selected bond lengths (Å) for RbBPO<sub>4</sub>F, CsBPO<sub>4</sub>F and (NH<sub>4</sub>)<sub>2</sub>BPO<sub>4</sub>F<sub>2</sub>.

Table S3. Hydrogen bond lengths [Å] for (NH<sub>4</sub>)<sub>2</sub>BPO<sub>4</sub>F<sub>2</sub>.

Table S4. The calculated SHG tensors of RbBPO<sub>4</sub>F, CsBPO<sub>4</sub>F and (NH<sub>4</sub>)<sub>2</sub>BPO<sub>4</sub>F<sub>2</sub>.

Figure S1. Powder X-ray diffraction patterns of RbBPO<sub>4</sub>F, CsBPO<sub>4</sub>F and (NH<sub>4</sub>)<sub>2</sub>BPO<sub>4</sub>F<sub>2</sub>.

Figure S2. The Energy dispersive X-ray spectroscopy of RbBPO<sub>4</sub>F, CsBPO<sub>4</sub>F and (NH<sub>4</sub>)<sub>2</sub>BPO<sub>4</sub>F<sub>2</sub>.

Figure S3. The coordination environments around Rb<sup>+</sup> and Cs<sup>+</sup> in RbBPO<sub>4</sub>F and CsBPO<sub>4</sub>F.

Figure S4. The Energy dispersive X-ray spectroscopy of the thermal decomposition residuals for RbBPO<sub>4</sub>F, CsBPO<sub>4</sub>F and (NH<sub>4</sub>)<sub>2</sub>BPO<sub>4</sub>F<sub>2</sub>.

Figure S5. The calculated refractive indices of (NH<sub>4</sub>)<sub>2</sub>BPO<sub>4</sub>F<sub>2</sub>.

**Table S1.** Crystal data and structure refinements for RbBPO<sub>4</sub>F, CsBPO<sub>4</sub>F and (NH<sub>4</sub>)<sub>2</sub>BPO<sub>4</sub>F<sub>2</sub>.

| Formula                           | RbBPO <sub>4</sub> F                                     | CsBPO <sub>4</sub> F                                     | (NH <sub>4</sub> ) <sub>2</sub> BPO <sub>4</sub> F <sub>2</sub> |
|-----------------------------------|----------------------------------------------------------|----------------------------------------------------------|-----------------------------------------------------------------|
| Formula weight                    | 210.25                                                   | 257.69                                                   | 179.86                                                          |
| Temperature                       | 293(2) K                                                 | 293(2) K                                                 | 293                                                             |
| Wavelength                        | 0.71073                                                  | 0.71073                                                  | 1.54178                                                         |
| Space group                       | <i>P</i> 2 <sub>1</sub> 3                                | <i>P</i> 2 <sub>1</sub> 3                                | <i>P</i> 2 <sub>1</sub>                                         |
| a (Å), α (deg.)                   | 7.6147, 90                                               | 7.7275, 90                                               | 4.5122, 90                                                      |
| b (Å), β (deg.)                   | 7.6147, 90                                               | 7.7275, 90                                               | 11.5395, 89.957                                                 |
| c (Å), γ (deg.)                   | 7.6147, 90                                               | 7.7275, 90                                               | 12.7360, 90                                                     |
| Volume (Å <sup>3</sup> )          | 441.53(7)                                                | 461.44(6)                                                | 663.14(8)                                                       |
| Z, Calculated density             | 4, 3.163 Mg/m <sup>3</sup>                               | 4, 3.709 Mg/m <sup>3</sup>                               | 4, 1.802 Mg/m <sup>3</sup>                                      |
| Absorption coefficient            | 11.504 mm <sup>-1</sup>                                  | 8.303 mm <sup>-1</sup>                                   | 3.912 mm <sup>-1</sup>                                          |
| F(000)                            | 392                                                      | 464                                                      | 368                                                             |
| Theta range for data collection   | 3.78 to 28.72 deg                                        | 3.73 to 28.84 deg                                        | 3.47 to 74.53 deg                                               |
| Limiting indices                  | -9 ≤ h ≤ 9, -10 ≤ k ≤ 9, -10 ≤ l ≤ 9                     | -10 ≤ h ≤ 8, -9 ≤ k ≤ 9, -10 ≤ l ≤ 10                    | -5 ≤ h ≤ 5, -9 ≤ k ≤ 14, -15 ≤ l ≤ 14                           |
| Reflections collected/unique      | 3167 / 369 [R(int) = 0.0814]                             | 3389 / 400 [R(int) = 0.1683]                             | 4078 / 2012 [R(int) = 0.0262]                                   |
| Completeness to theta             | 96.2 %                                                   | 96.8 %                                                   | 97.2 %                                                          |
| Refinement method                 | Full-matrix least-squares on F <sub>o</sub> <sup>2</sup> | Full-matrix least-squares on F <sub>o</sub> <sup>2</sup> | Full-matrix least-squares on F <sub>o</sub> <sup>2</sup>        |
| Final R indices [I > 2σ(I)]       | R1 = 0.0272, wR2 = 0.0609                                | R1 = 0.0293, wR2 = 0.0662                                | R1 = 0.0383, wR2 = 0.0992                                       |
| R indices (all data) <sup>a</sup> | R1 = 0.0297, wR2 = 0.0637                                | R1 = 0.0325, wR2 = 0.0693                                | R1 = 0.0386, wR2 = 0.0995                                       |
| Largest diff. peak and hole       | 0.395 and -0.701 e.Å <sup>-3</sup>                       | 0.669 and -1.003 e.Å <sup>-3</sup>                       | 0.517 and -0.412 e.Å <sup>-3</sup>                              |

<sup>a</sup>R<sub>1</sub> = Σ||F<sub>o</sub>| - |F<sub>c</sub>||/Σ|F<sub>o</sub>| and wR<sub>2</sub> = [Σw(F<sub>o</sub><sup>2</sup> - F<sub>c</sub><sup>2</sup>)<sup>2</sup>/ΣwF<sub>o</sub><sup>4</sup>] 1/2 for F<sub>o</sub><sup>2</sup> > 2σ(F<sub>o</sub><sup>2</sup>).

**Table S2.** Selected bond lengths (Å) for RbBPO<sub>4</sub>F, CsBPO<sub>4</sub>F and (NH<sub>4</sub>)<sub>2</sub>BPO<sub>4</sub>F<sub>2</sub>.

| RbBPO <sub>4</sub> F |          | CsBPO <sub>4</sub> F |           | (NH <sub>4</sub> ) <sub>2</sub> BPO <sub>4</sub> F <sub>2</sub> |          |
|----------------------|----------|----------------------|-----------|-----------------------------------------------------------------|----------|
| Rb(1)-O(2)           | 3.082(2) | Cs(1)-O(2)           | 3.136(3)  | B(1)-F(1)                                                       | 1.398(7) |
| Rb(1)-O(2)#1         | 3.082(2) | Cs(1)-O(2)#1         | 3.136(3)  | B(1)-O(1)                                                       | 1.416(7) |
| Rb(1)-O(2)#2         | 3.082(2) | Cs(1)-O(2)#2         | 3.136(3)  | B(1)-F(2)                                                       | 1.434(6) |
| Rb(1)-O(1)#3         | 3.152(2) | Cs(1)-F(1)#3         | 3.263(3)  | B(1)-O(4)#1                                                     | 1.478(6) |
| Rb(1)-O(1)#4         | 3.152(2) | Cs(1)-F(1)#4         | 3.263(3)  | B(2)-F(3)                                                       | 1.395(6) |
| Rb(1)-O(1)#5         | 3.152(2) | Cs(1)-F(1)#2         | 3.263(3)  | B(2)-F(4)                                                       | 1.399(6) |
| Rb(1)-O(1)#6         | 3.232(2) | Cs(1)-O(1)#5         | 3.263(4)  | B(2)-O(5)                                                       | 1.410(7) |
| Rb(1)-O(1)#7         | 3.232(2) | Cs(1)-O(1)#6         | 3.263(4)  | B(2)-O(6)#2                                                     | 1.493(7) |
| Rb(1)-O(1)#8         | 3.232(2) | Cs(1)-O(1)#7         | 3.263(4)  | P(1)-O(3)                                                       | 1.505(3) |
| Rb(1)-F(1)#9         | 3.258(2) | Cs(1)-O(1)#8         | 3.328(4)  | P(1)-O(2)                                                       | 1.511(3) |
| Rb(1)-F(1)#10        | 3.258(2) | Cs(1)-O(1)#9         | 3.328(4)  | P(1)-O(1)                                                       | 1.557(3) |
| Rb(1)-F(1)           | 3.258(2) | Cs(1)-O(1)#10        | 3.328(4)  | P(1)-O(4)                                                       | 1.560(4) |
| B(1)-F(1)            | 1.408(7) | B(1)-F(1)            | 1.408(12) | P(2)-O(7)                                                       | 1.495(3) |
| B(1)-O(1)#11         | 1.460(3) | B(1)-O(1)#10         | 1.461(5)  | P(2)-O(8)                                                       | 1.497(4) |
| B(1)-O(1)#12         | 1.460(3) | B(1)-O(1)#11         | 1.461(5)  | P(2)-O(6)                                                       | 1.559(4) |
| B(1)-O(1)            | 1.460(3) | B(1)-O(1)            | 1.461(5)  | P(2)-O(5)                                                       | 1.590(4) |
| P(1)-O(2)            | 1.484(4) | P(1)-O(2)            | 1.495(7)  |                                                                 |          |
| P(1)-O(1)            | 1.554(2) | P(1)-O(1)            | 1.560(3)  |                                                                 |          |
| P(1)-O(1)#13         | 1.554(2) | P(1)-O(1)#12         | 1.560(3)  |                                                                 |          |
| P(1)-O(1)#14         | 1.554(2) | P(1)-O(1)#13         | 1.560(3)  |                                                                 |          |

**Symmetry codes for the generated atoms:**

For RbBPO<sub>4</sub>F: #1  $x+1/2, -y+3/2, -z$ ; #2  $-x+3/2, -y+2, z-1/2$ ; #3  $-y+1, z+1/2, -x+1/2$ ;  
 #4  $z+1/2, -x+3/2, -y$ ; #5  $-x+3/2, -y+1, z-1/2$ ; #6  $y+1/2, -z+3/2, -x+1$ ; #7  $-x+2, y+1/2, -z+1/2$ ;  
 #8  $-z+3/2, -x+2, y-1/2$ ; #9  $-x+2, y+1/2, -z-1/2$ ; #10  $x-1/2, -y+3/2, -z$ ; #11  $-z+1, x-1/2, -y+1/2$ ;  
 #12  $y+1/2, -z+1/2, -x+1$ ; #13  $-y+3/2, -z+1, x-1/2$ ; #14  $z+1/2, -x+3/2, -y+1$ .

For CsBPO<sub>4</sub>F: #1  $-x+1, y+1/2, -z+1/2$ ; #2  $-x+3/2, -y, z+1/2$ ; #3  $x, y, z+1$ ; #4  $x-1/2, -y+1/2, -z$ ; #5  $y, z, x$ ;  
 #6  $-x+1, y-1/2, -z+1/2$ ; #7  $z+1/2, -x+1/2, -y+1$ ; #8  $z+1, x, y$ ; #9  $x+1/2, -y+1/2, -z$ ; #10  $-y+1, z+1/2, -x+1/2$ ;  
 #11  $-z+1/2, -x+1, y-1/2$ ; #12  $z+1/2, -x+1/2, -y$ ; #13  $-y+1/2, -z, x-1/2$ .

For (NH<sub>4</sub>)<sub>2</sub>BPO<sub>4</sub>F<sub>2</sub>: #1  $x-1, y, z$ ; #2  $x+1, y, z$ .

**Table S3.** Hydrogen bond lengths [ $\text{\AA}$ ] for  $(\text{NH}_4)_2\text{BPO}_4\text{F}_2$ .

|                |          |                |          |
|----------------|----------|----------------|----------|
| N(1)...O(3)    | 2.801(6) | N(1) ...F(2)#2 | 2.912(6) |
| N(1) ...O(3)#1 | 2.808(7) | N(2) ...O(2)#2 | 2.839(6) |
| N(1) ...O(8)#1 | 2.818(5) | N(2) ...F(4)#3 | 2.887(5) |
| N(2) ...O(4)#4 | 2.895(6) | N(4) ...O(7)   | 2.764(6) |
| N(2) ...F(1)   | 2.923(7) | N(4) ...O(7)#1 | 2.778(6) |
| N(3) ...O(8)#1 | 2.854(6) | N(4) ...F(2)#2 | 2.855(5) |
| N(3) ...O(2)   | 2.889(5) | N(4) ...O(6)#6 | 2.866(6) |
| N(3) ...F(3)#5 | 2.988(5) |                |          |

**Symmetry codes for the generated atoms:**

#1  $x+1, y, z$ ; #2  $-x, y+1/2, -z+1$ ; #3  $x, y, z-1$ ; #4  $-x+1, y+1/2, -z+1$ ; #5  $-x, y-1/2, -z+2$ ; #6  $-x, y+1/2, -z+2$ .

**Table S4.** The calculated SHG tensors of RbBPO<sub>4</sub>F, CsBPO<sub>4</sub>F and (NH<sub>4</sub>)<sub>2</sub>BPO<sub>4</sub>F<sub>2</sub>.

|                                                                  | <b>RbBPO<sub>4</sub>F</b>   | <b>CsBPO<sub>4</sub>F</b>   | <b>(NH<sub>4</sub>)<sub>2</sub>BPO<sub>4</sub>F<sub>2</sub></b>                              |
|------------------------------------------------------------------|-----------------------------|-----------------------------|----------------------------------------------------------------------------------------------|
| calculated SHG<br>coefficient tensors<br>( $\times 10^{-9}$ esu) | $d_{14}=d_{25}=d_{36}=1.24$ | $d_{14}=d_{25}=d_{36}=1.75$ | $d_{14}=d_{25}=d_{36}=1.10$<br>$d_{16}=d_{21}=0.55$<br>$d_{22}=2.10$<br>$d_{23}=d_{34}=1.57$ |

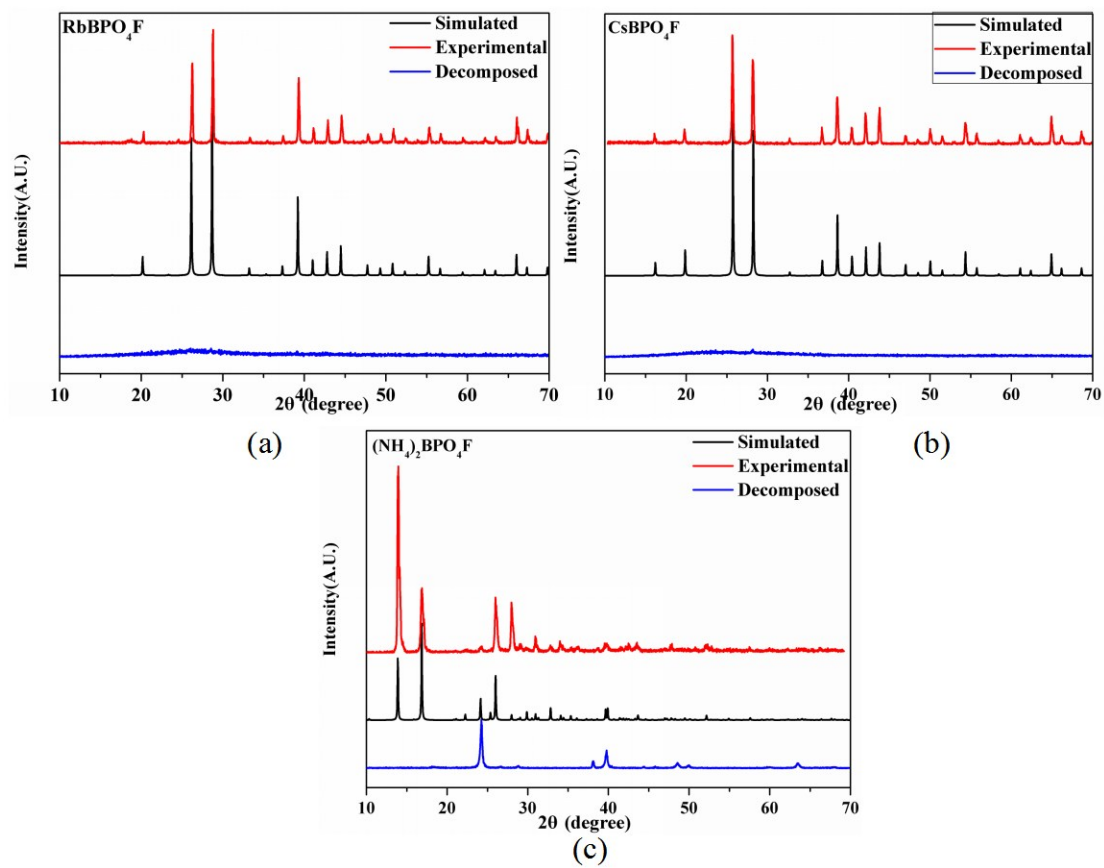

**Figure S1.** Powder X-ray diffraction patterns of  $\text{RbBPO}_4\text{F}$ ,  $\text{CsBPO}_4\text{F}$  and  $(\text{NH}_4)_2\text{BPO}_4\text{F}_2$ .

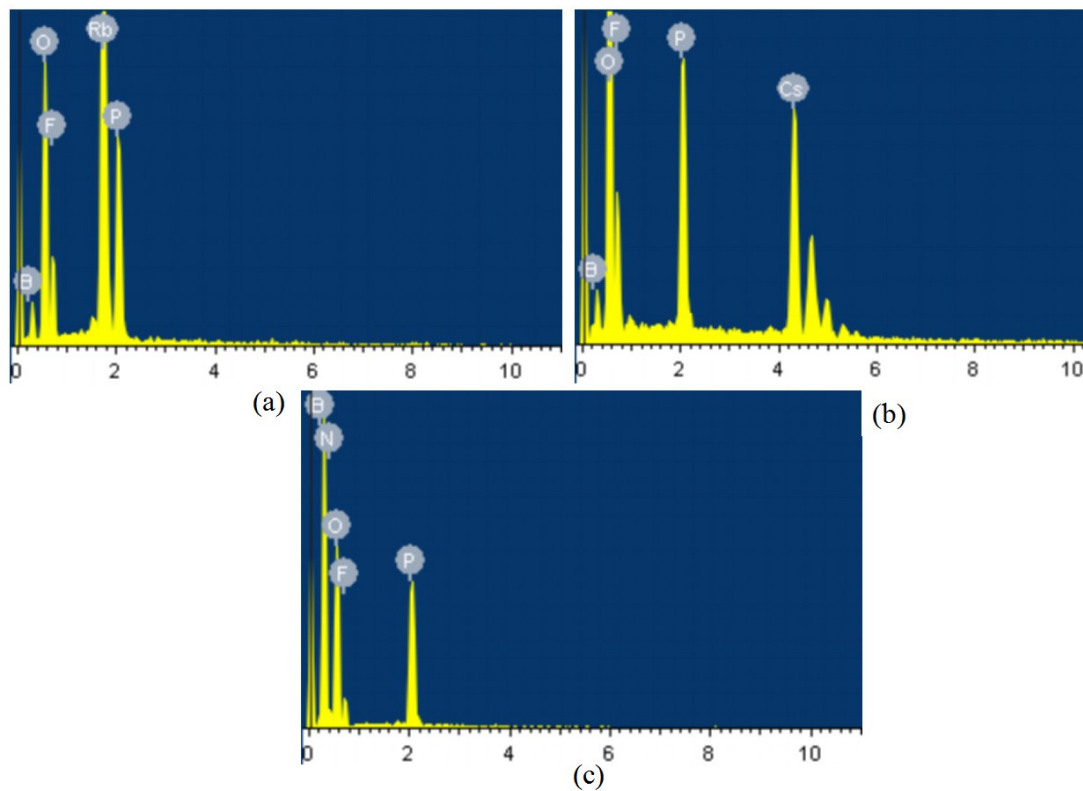

**Figure S2.** The Energy dispersive X-ray spectroscopy of  $\text{RbBPO}_4\text{F}$ ,  $\text{CsBPO}_4\text{F}$  and  $(\text{NH}_4)_2\text{BPO}_4\text{F}_2$ .

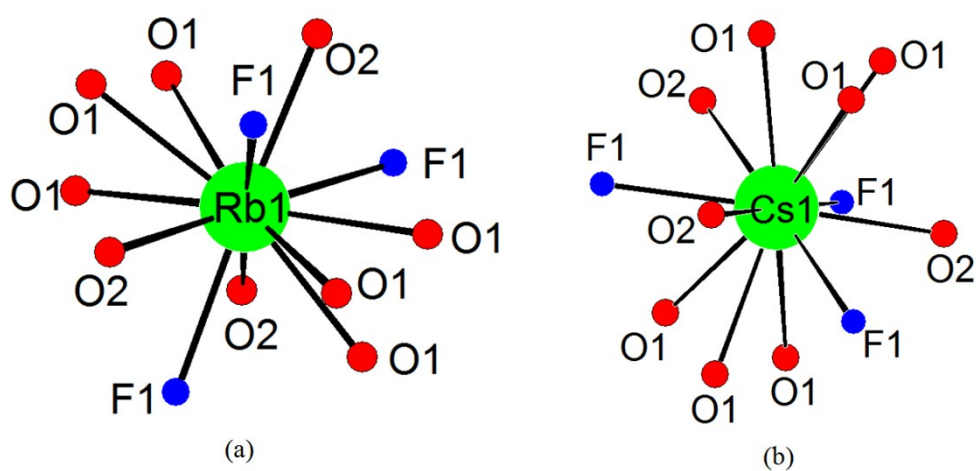

**Figure S3.** The coordination environments around  $\text{Rb}^+$  and  $\text{Cs}^+$  in  $\text{RbBPO}_4\text{F}$  and  $\text{CsBPO}_4\text{F}$ .



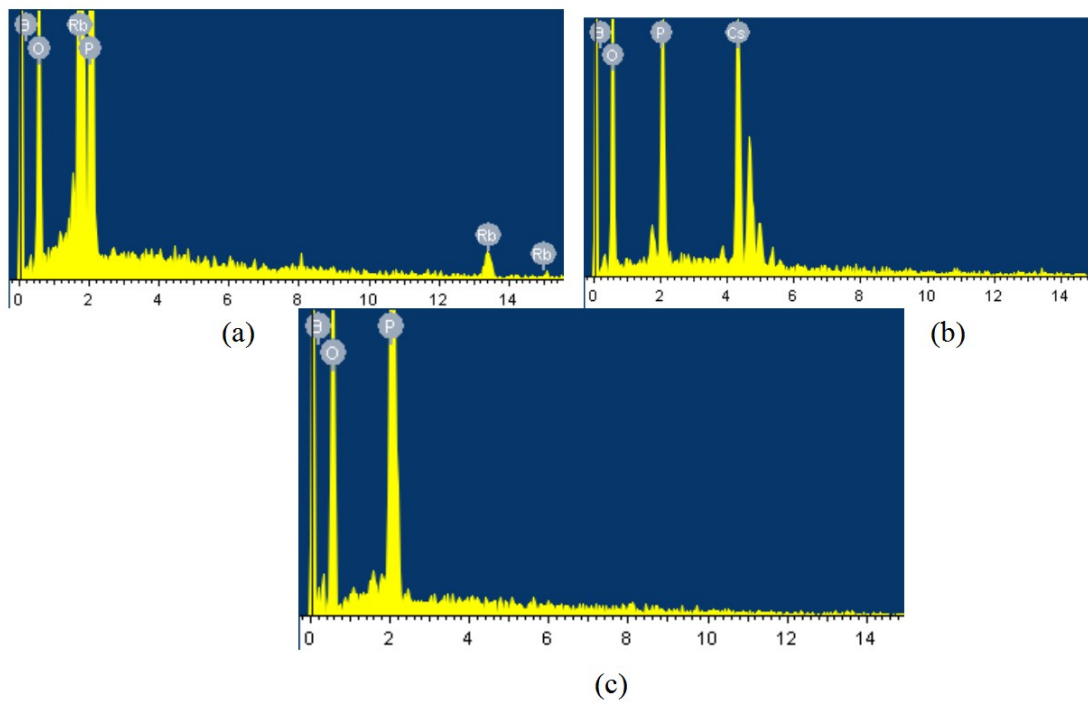

**Figure S4.** The Energy dispersive X-ray spectroscopy of the thermal decomposition residuals for RbBPO<sub>4</sub>F, CsBPO<sub>4</sub>F and (NH<sub>4</sub>)<sub>2</sub>BPO<sub>4</sub>F<sub>2</sub>.

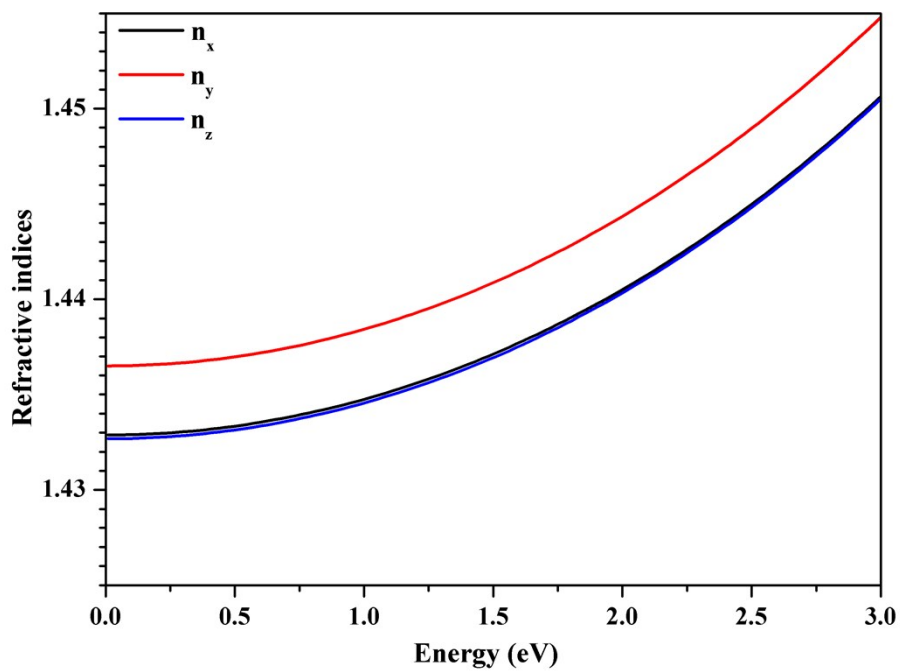

**Figure S5.** The calculated refractive indices of (NH<sub>4</sub>)<sub>2</sub>BPO<sub>4</sub>F<sub>2</sub>.
